# Supplementary material for: Controllable synthesis of ZnO-based core/shell nanorods and core/shell nanotubes
Source: Royal Society of Chemistry journal article supplement (doi:10.1039/c1ra00110h), 2011-01-01
Supplement: c1ra00110h.pdf [file c1ra00110h.pdf]

## Supporting Information

### Controllable synthesis of ZnO-based core/shell nanorods and core/shell nanotubes

Zi-Long Wang, Gao-Ren Li,\* Yan-Nan Ou, Liang-Xin Ding, Rui Guo, and Ye-Xiang Tong

*MOE of Key Laboratory of Bioinorganic and Synthetic Chemistry/School of Chemistry and Chemical Engineering/Institute of Optoelectronic and Functional Composite Materials, Sun Yat-sen University, Guangzhou 510275, P. R. China*

E-mail: [ligaoren@mail.sysu.edu.cn](mailto:ligaoren@mail.sysu.edu.cn)

#### Experimental Section

A simple three-electrode cell was used in our experiments. The graphite electrode was used as a counter electrode (spectral grade, 1.8 cm<sup>2</sup>). The saturated calomel electrode (SCE) was used as the reference electrode that was connected to the cell with a double salt bridge system. The metal (Ti and Cu) plates (99.99 wt%, 1.5 cm<sup>2</sup>) were used as the substrates for electrodeposition, and they are prepared complying the following steps before each experiment: firstly polished by SiC abrasive paper from 300 to 800 grits, then dipped in HCl solution (5%) for 5 min and rinsed with acetone in ultrasonic bath for 5 min, and finally washed by distilled water. ZnO nanorods were firstly electrodeposited in solution of 0.01 M Zn(NO<sub>3</sub>)<sub>2</sub>+0.1M NH<sub>4</sub>NO<sub>3</sub> by galvanostatic electrolysis for 60 min at 70 °C. ZnO/Bi<sub>2</sub>O<sub>3</sub> core/shell nanorods were synthesized on Ti substrate by the electrodeposition of Bi<sub>2</sub>O<sub>3</sub> on the surfaces of ZnO nanorods in solution of 0.01 M Bi(NO<sub>3</sub>)<sub>3</sub>+0.02M

$\text{NH}_4\text{NO}_3$  (pH=6.5) by galvanostatic electrolysis with current density of  $1.5 \text{ mA/cm}^2$  for 60 min at room temperature. ZnO/PANI core/shell hybrid nanotubes were prepared on Cu substrate by the electrochemical polymerization of PANI on the surfaces of ZnO nanorods in solution of 0.1 M aniline+0.1 M  $\text{NH}_4\text{NO}_3$  (pH=1) with current density of  $0.5 \text{ mA/cm}^2$  for 60 min and synchronously etching of ZnO nanorods under the role of acid.

The synthesized ZnO/ $\text{Bi}_2\text{O}_3$  core/shell nanorods and ZnO/PANI core/shell nanotubes were characterized by thermal field emission environment scanning electron microscope (TFE-SEM, FEI, Quanta 400), transmission electron microscope (TEM, JEM-2010HR), X-ray diffraction (XRD, PIGAKU, D/MAX 2200 VPC), and X-ray photoelectron spectroscopy (XPS, ESCALAB 250). The electrochemical measurements were carried out in a Chi 660C electrochemical workstation. ZnO/ $\text{Bi}_2\text{O}_3$  core/shell nanorods were deposited on Ti substrate with a surface area of  $1.0 \text{ cm}^2$ , and they were studied as electrodes for supercapacitor applications in 1.0 M  $\text{Na}_2\text{SO}_4$  electrolyte. The graphite sheet was used as a counter electrode and the SCE was used as the reference electrode. The cyclic voltammetry experiments were performed between -0.20 and -1.0 V vs SCE at a scan rate of 5 mV/s. ZnO/PANI core/shell hybrid nanotubes were synthesized on Cu substrate by electrochemical polymerization/etching process. The photoluminescence (PL) measurements of ZnO/PANI core/shell nanotubes were carried out on a fluorescence spectrophotometer at room temperature, and the excited wavelength was 325 nm.

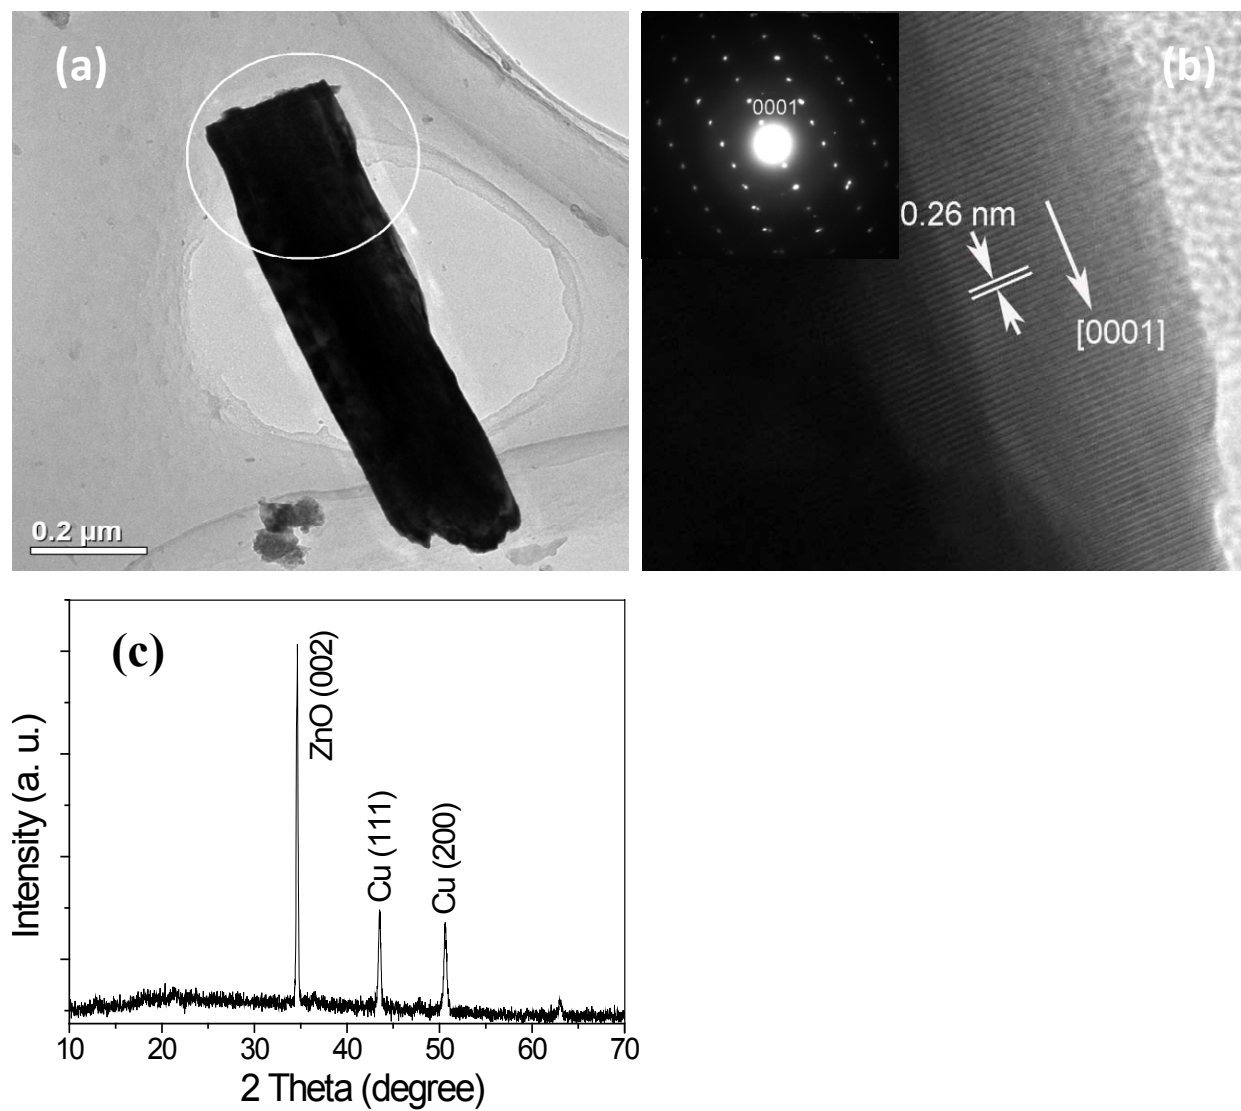

**Fig. S1** (a) TEM image, (b) HRTEM image and SAED pattern (inset), (c) XRD pattern of ZnO nanorods deposited in solution of 0.01 M  $\text{Zn}(\text{NO}_3)_2$  with current density of  $2.5 \text{ mA/cm}^2$  at  $70^\circ\text{C}$  for 60 min.

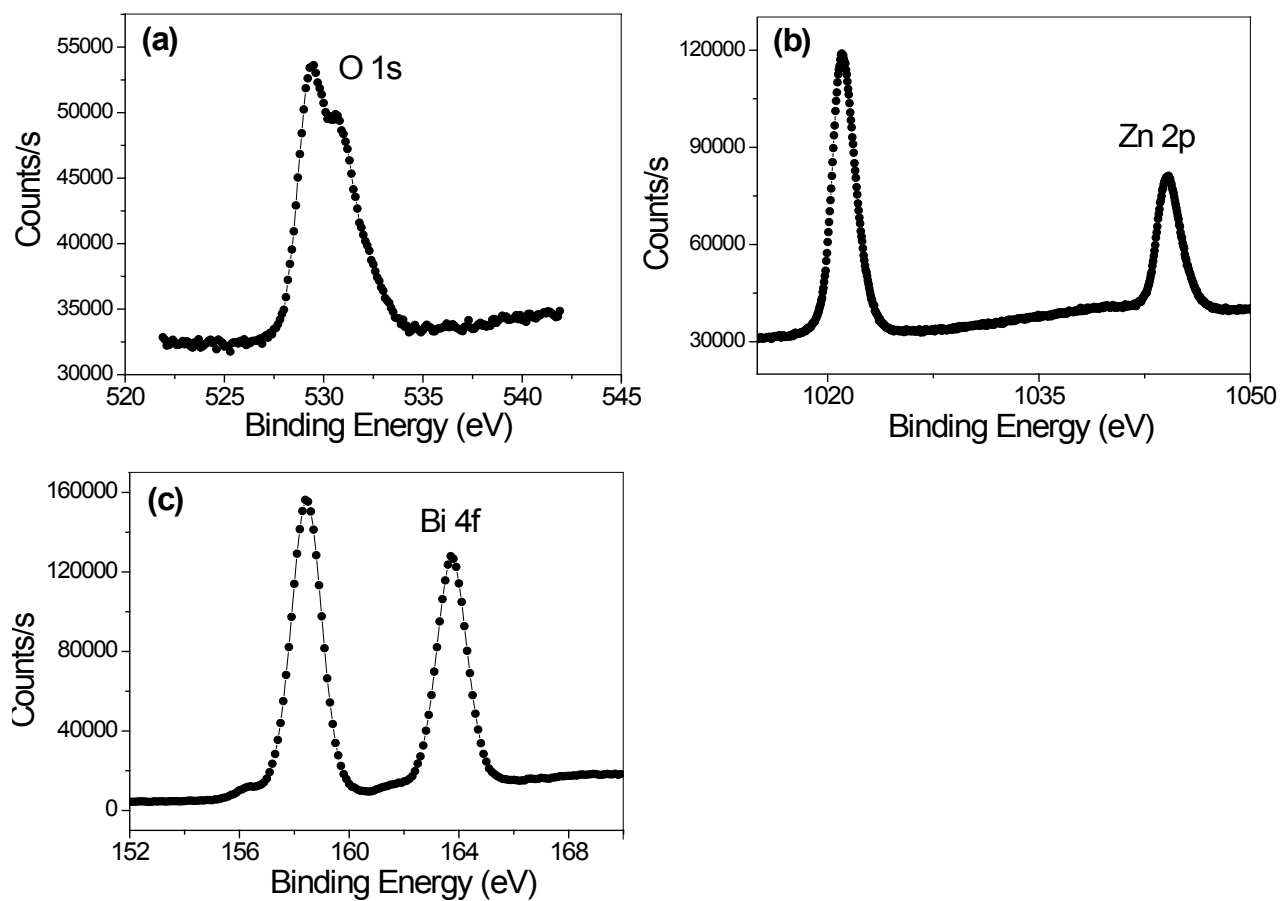

**Fig. S2** XPS spectra of ZnO/Bi<sub>2</sub>O<sub>3</sub> core/shell nanorods. (a) O 1s; (b) Zn 2p; (c) Bi 4f.

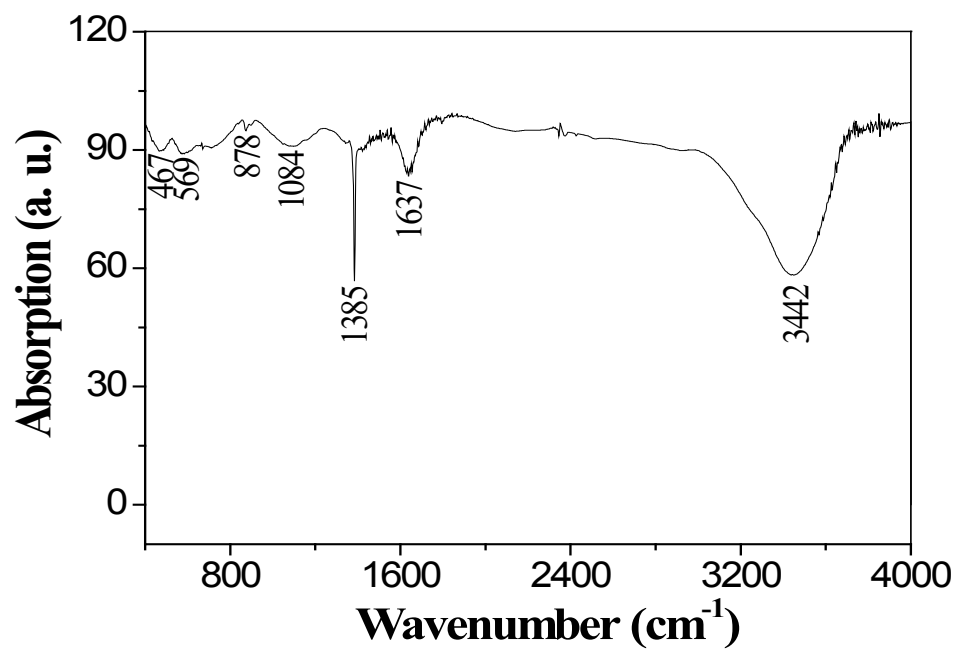

**Fig. S3** IR spectrum of ZnO/PANI core/shell nanotubes.
